# Supplementary material for: LUC7L3/CROP inhibits replication of hepatitis B virus via suppressing enhancer II/basal core promoter activity
Source: PubMed Central journal article supplement (PMC5114668; doi:10.1038/srep36741), 2016-11-18
Supplement: srep36741-s1.pdf [file srep36741-s1.pdf]

# **LUC7L3/CROP inhibits replication of hepatitis B virus via suppressing enhancer II/basal core promoter activity**

Yuan Li<sup>1</sup>, Masahiko Ito<sup>1</sup>, Suofeng Sun<sup>1</sup>, Takeshi Chida<sup>1</sup>, Kenji Nakashima<sup>1</sup>, Tetsuro Suzuki<sup>1</sup>

<sup>1</sup>Department of Virology and Parasitology, Hamamatsu University School of Medicine, Shizuoka 431-3192, Japan

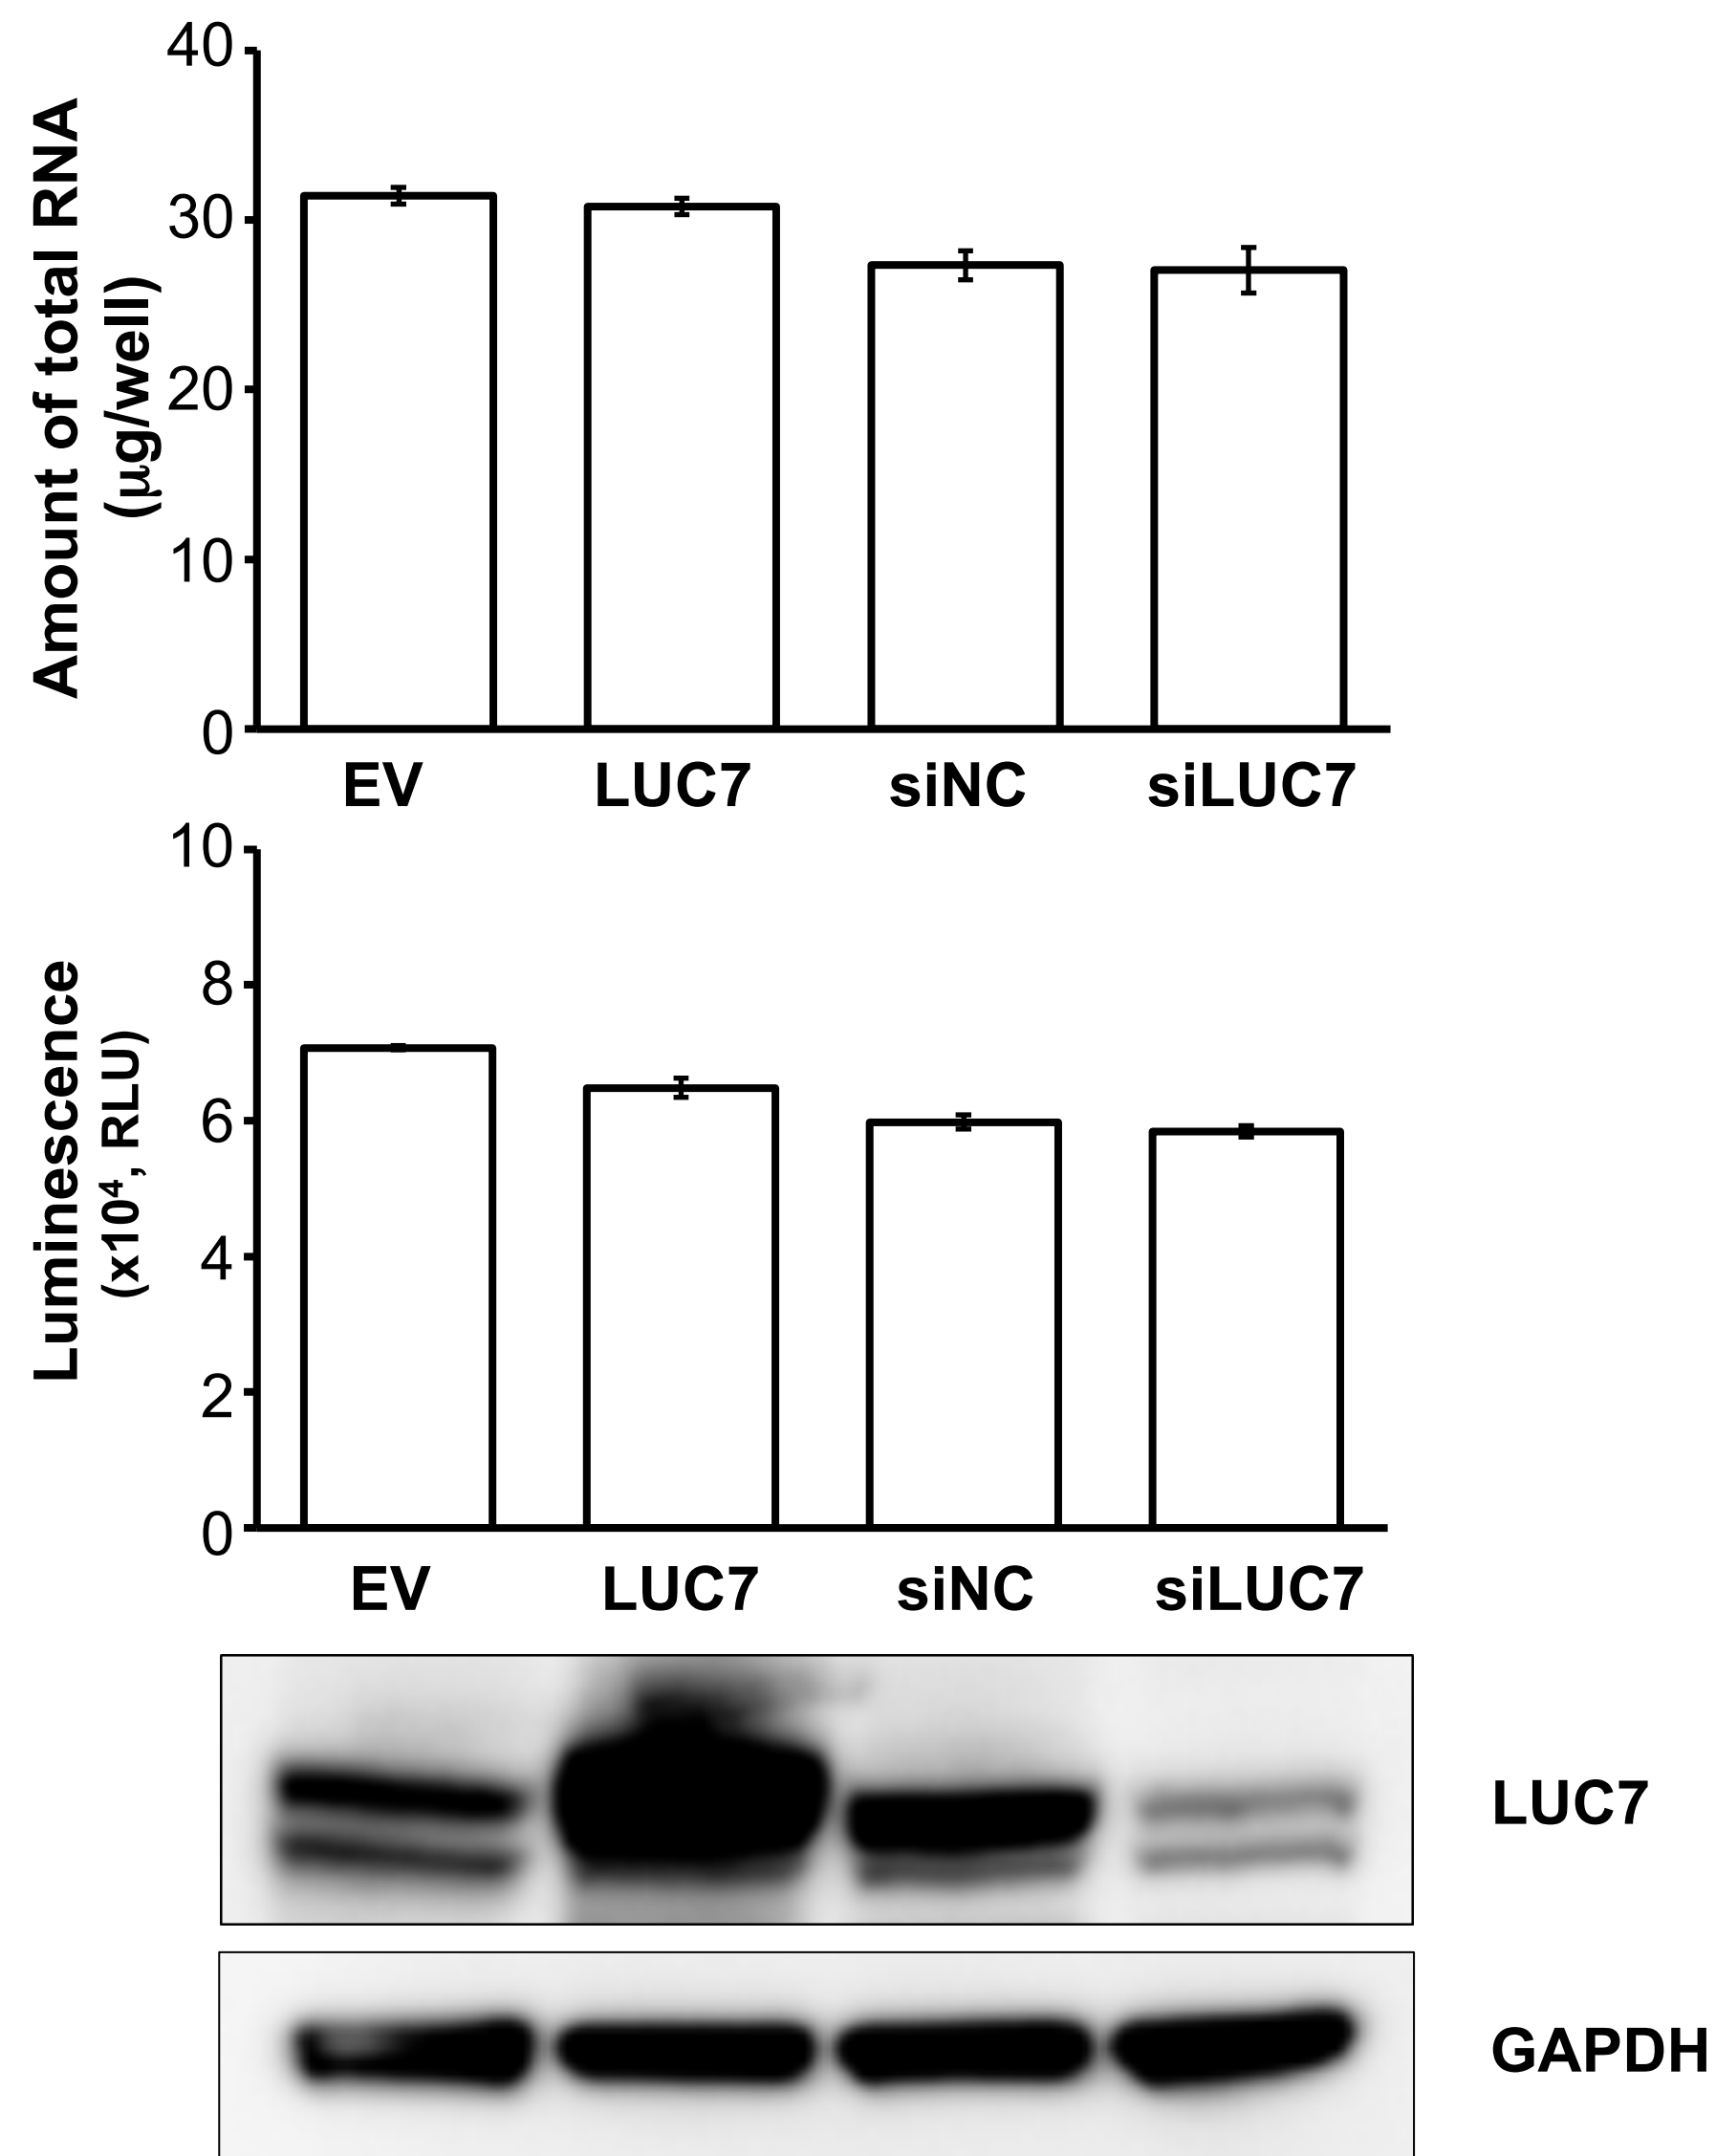

## Supplementary Figure S1

Effect of over-expression or knockdown of LUC7L3 on the cell viability. For knockdown of LUC7L3, HuH7 cells were transfected with siRNAs (siLUC7) or its negative control (siNC), and harvested 4 days later. For over-expression of LUC7L3, HuH7 cells were transfected with the LUC7L3-expression plasmid (LUC7) or an empty vector (EV), and harvested 2 days later. For the analysis of cell viability, amounts of total cellular RNAs were determined (upper) and ATP contents in cells were measured by CellTiter-Glo luminescent cell viability assay kit (middle). Protein expression of LUC7L3 as well as of GAPDH was assessed by immunoblotting (lower). Values shown represent the means with SEM obtained from three independent transfection of siRNAs or plasmids.

**A**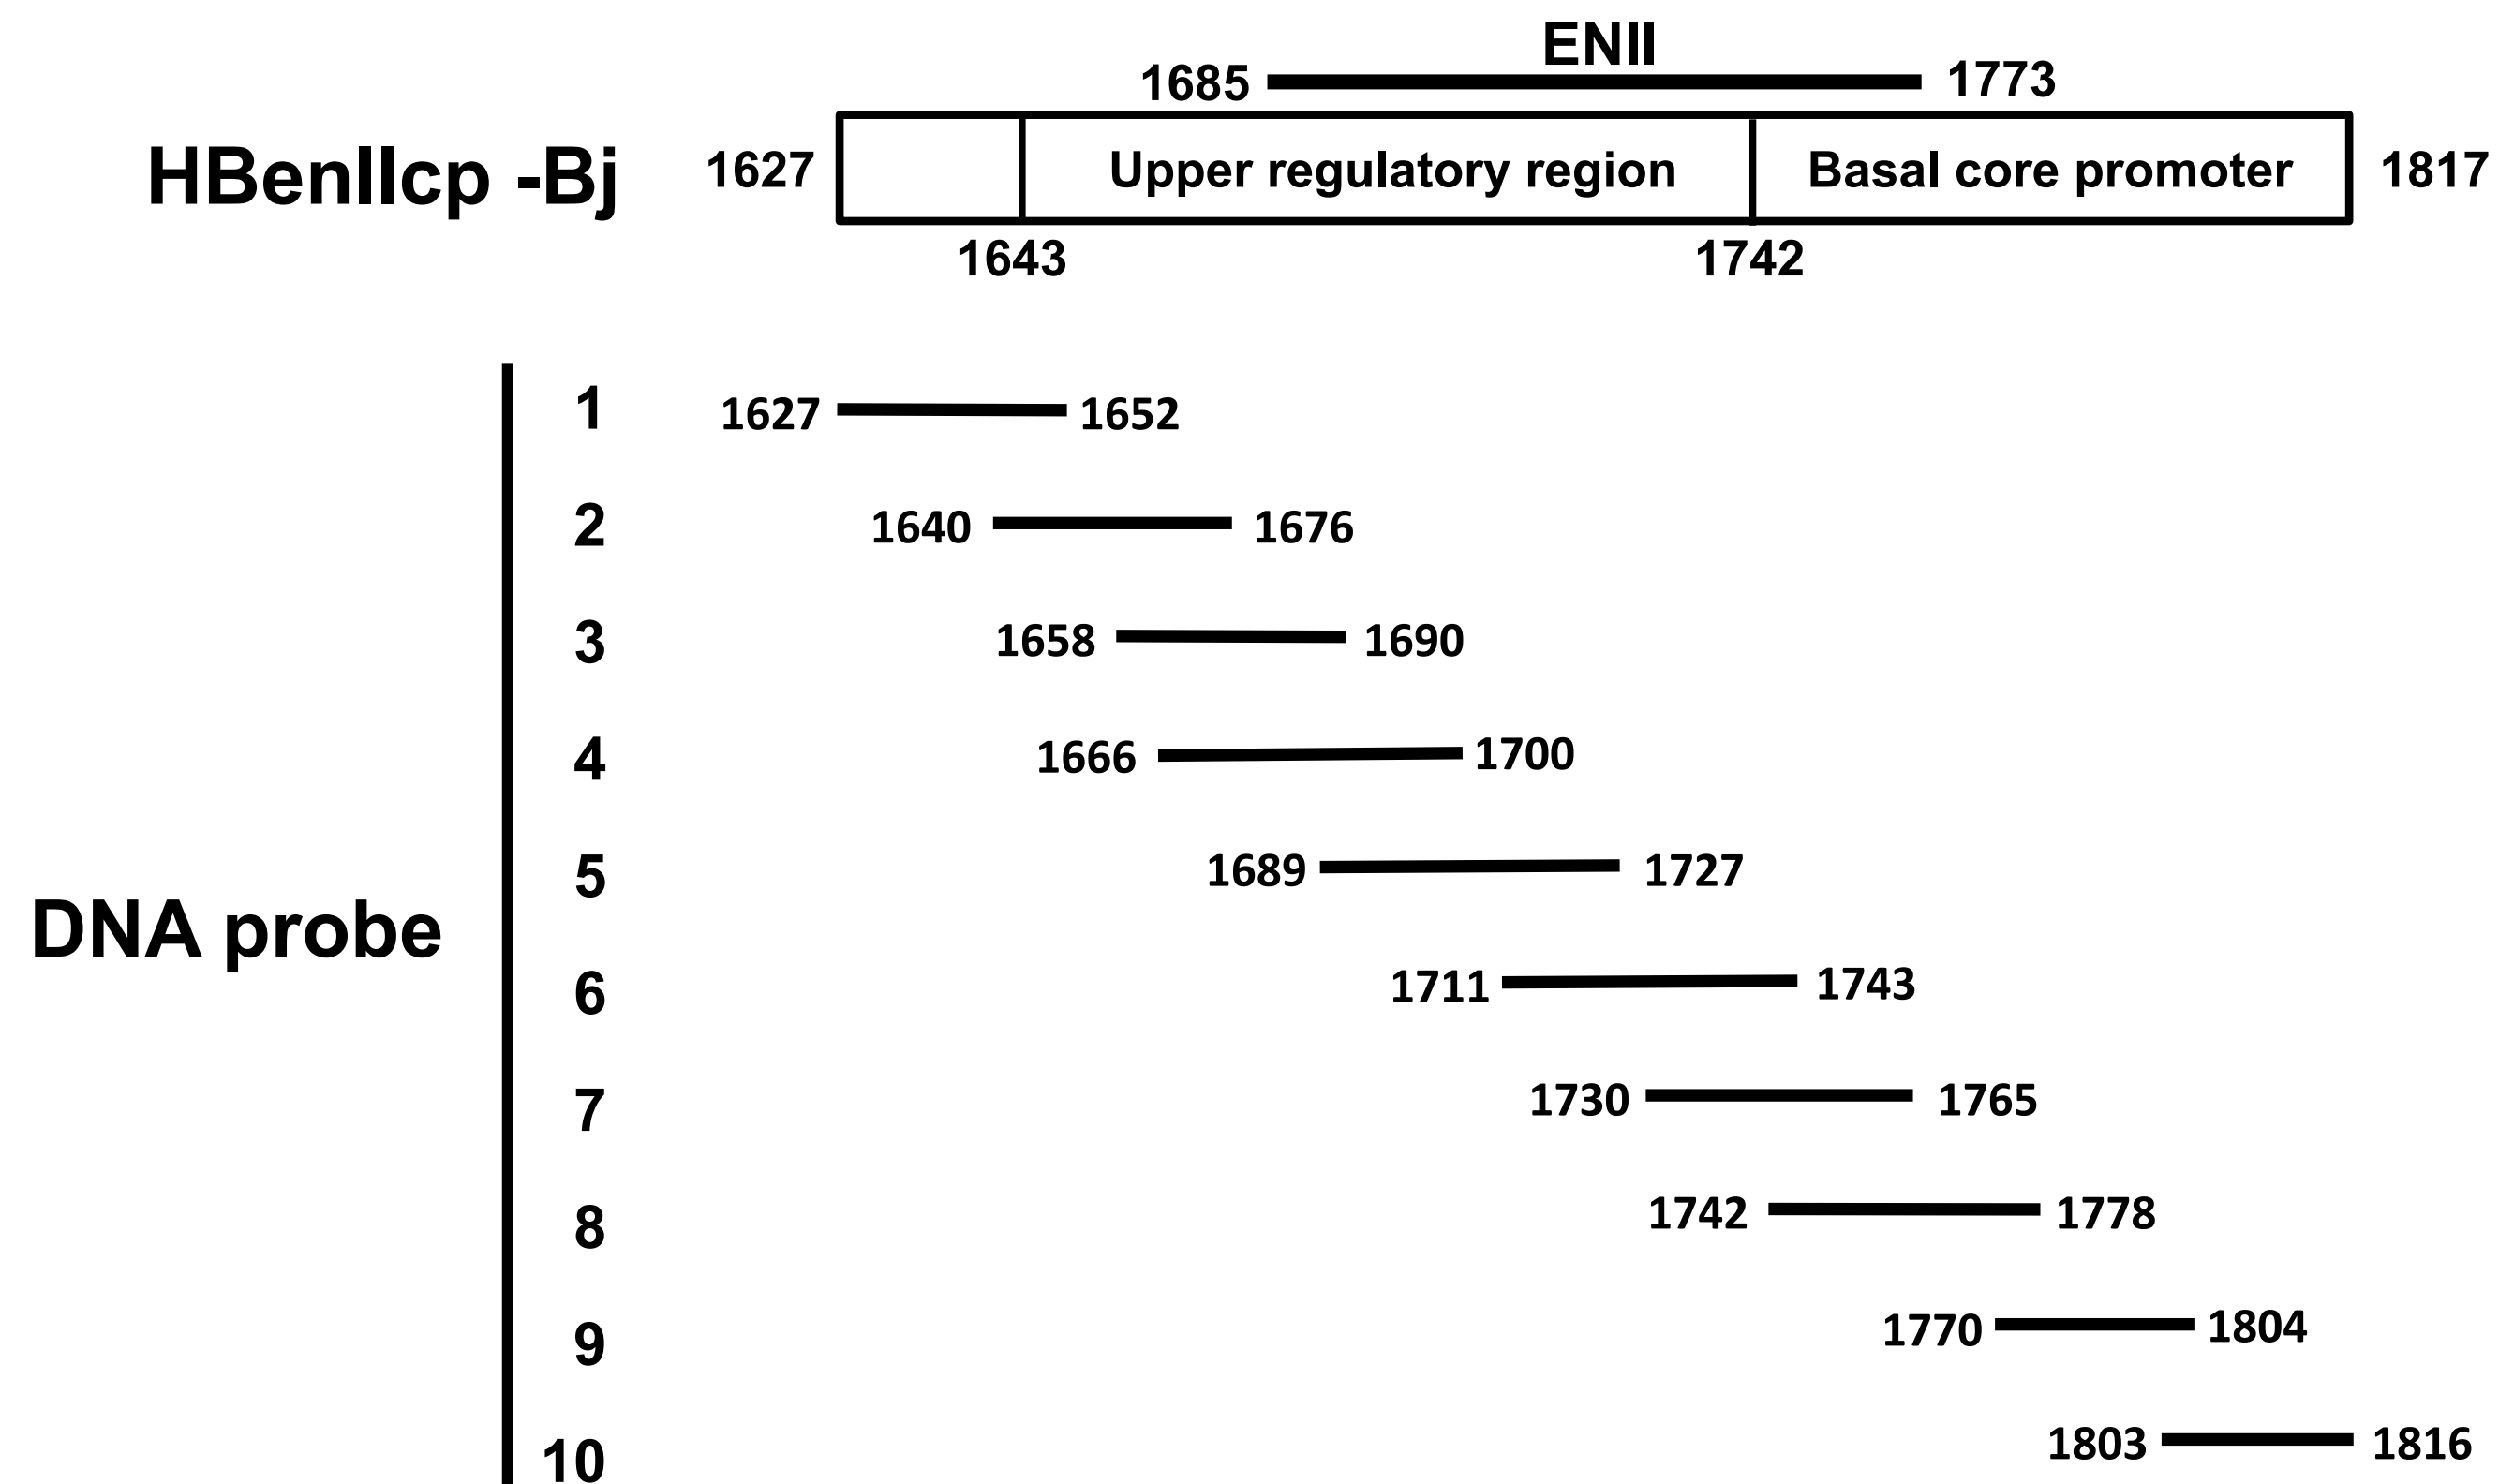**B**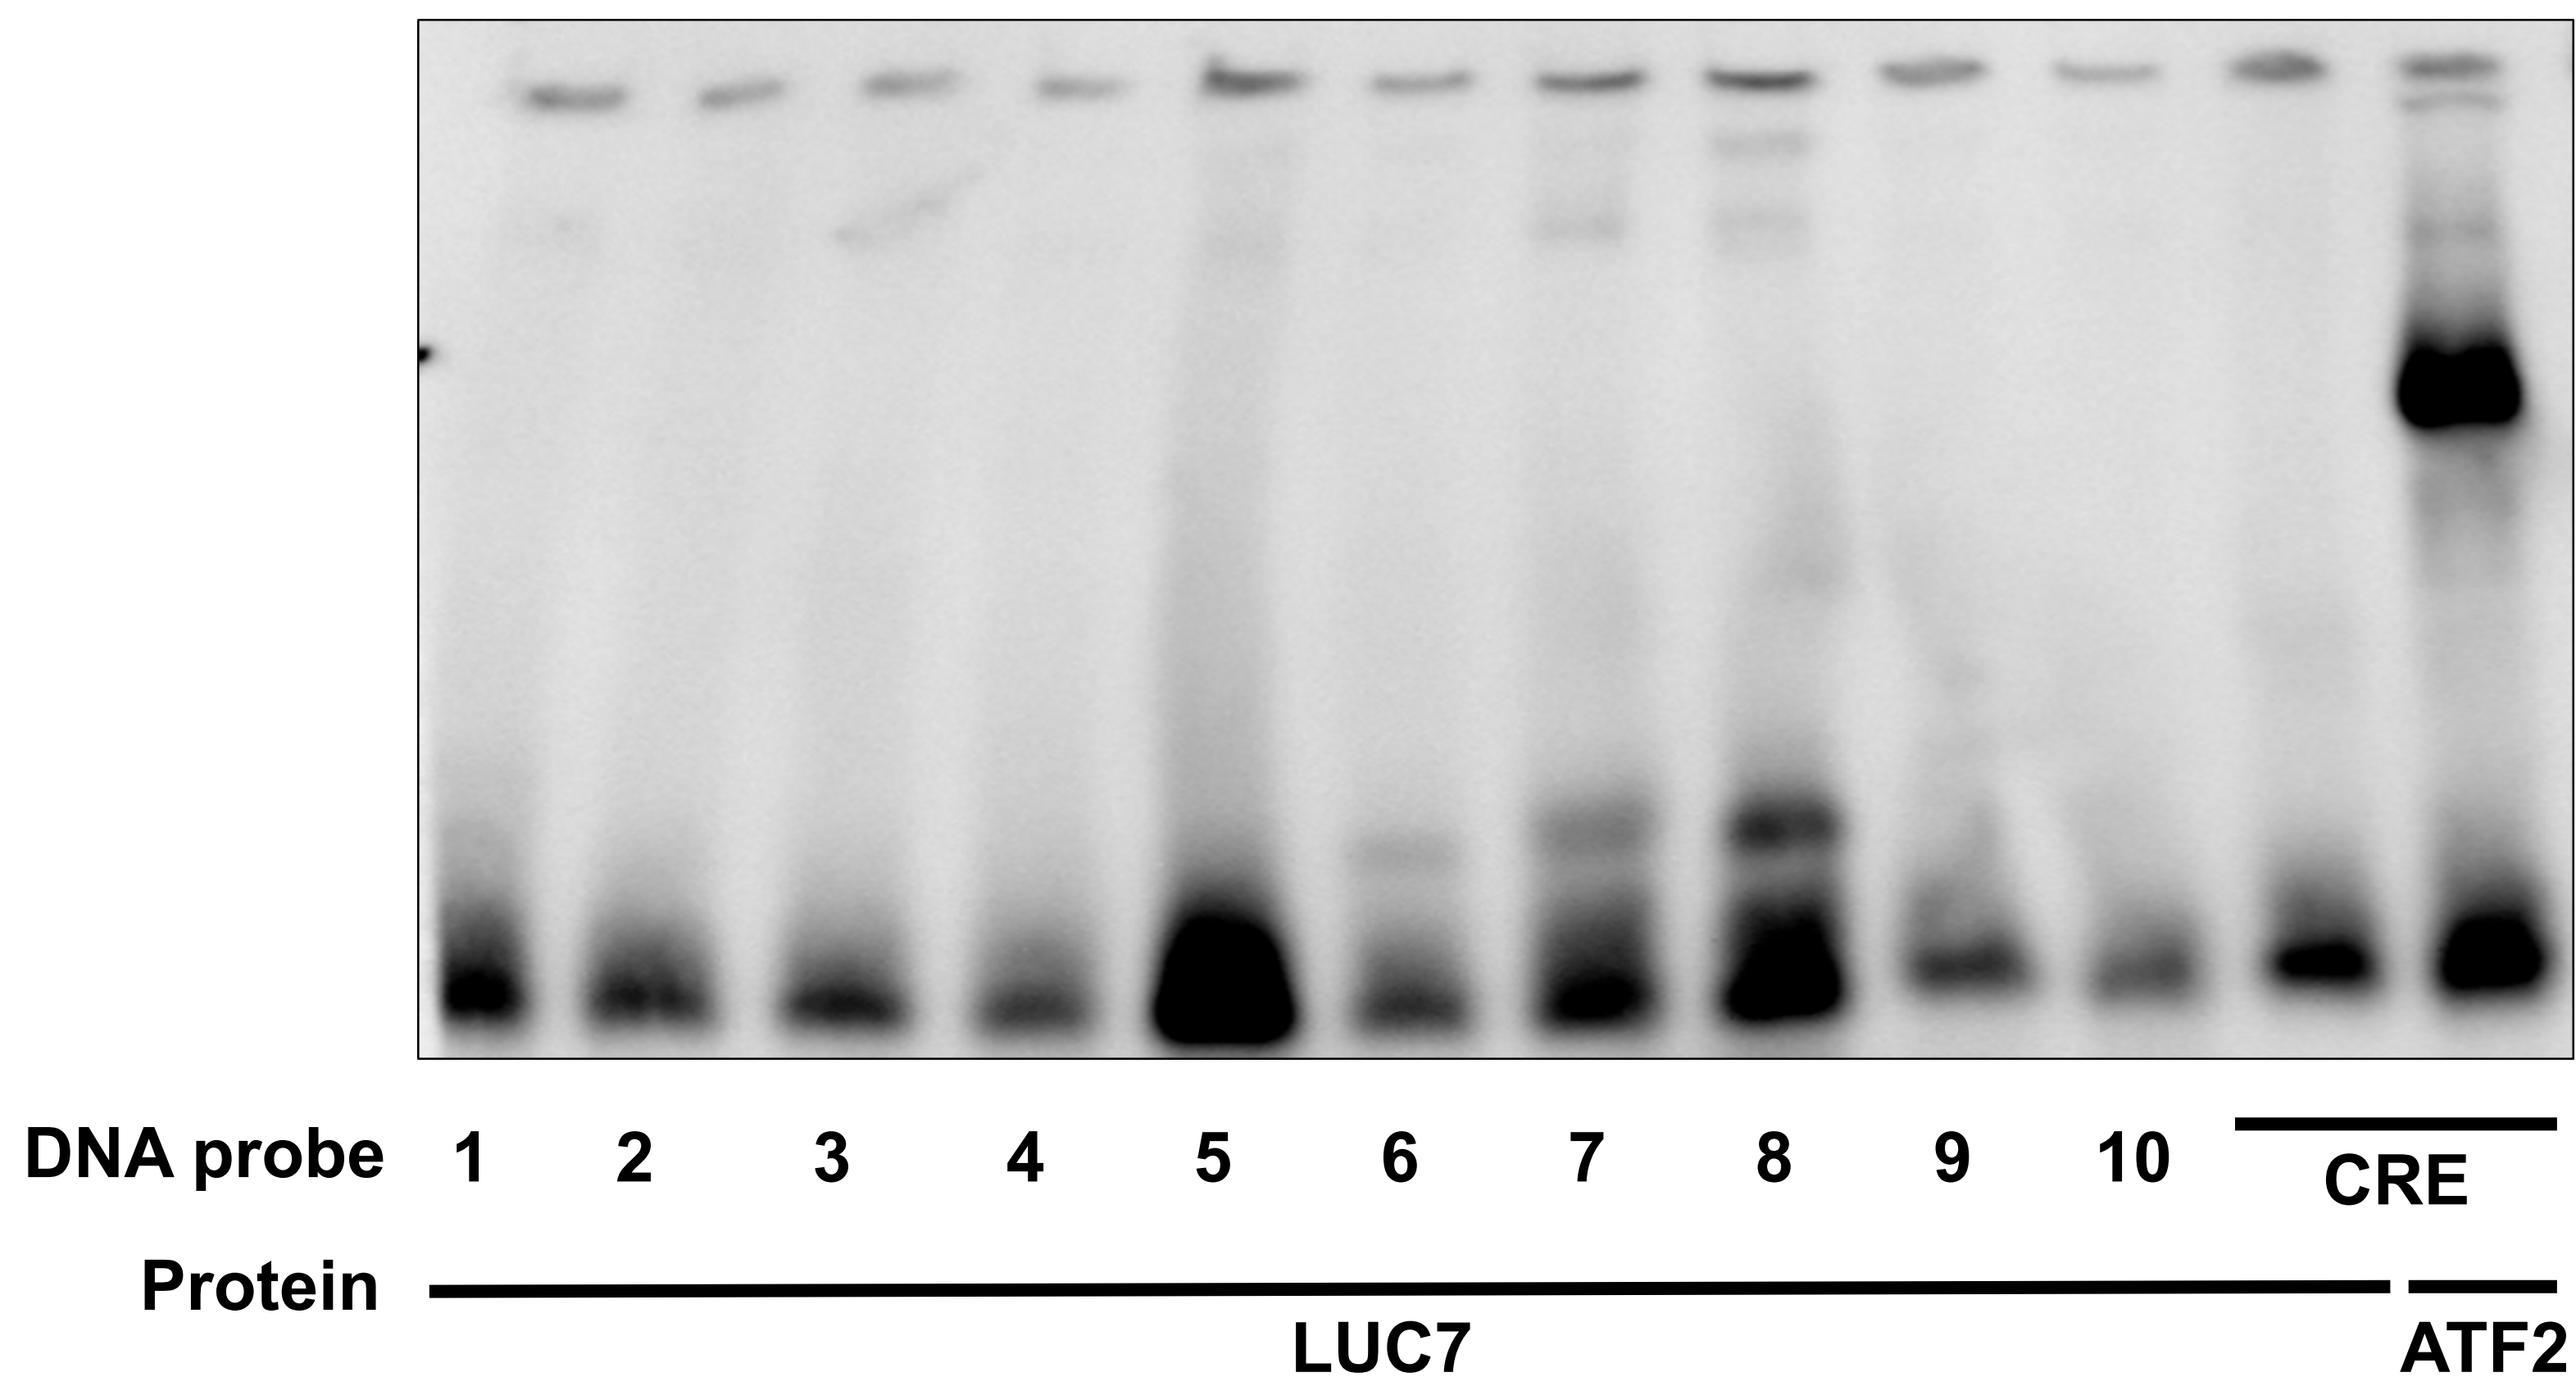**C**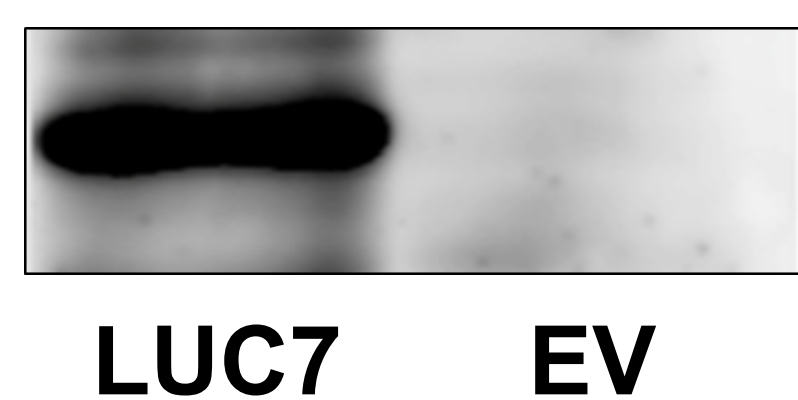

## Supplementary Figure S2

The electrophoretic mobility shift assay based on in vitro synthesized LUC7L3. A series of DNA probes for ENII/BCP region of the HBV genome used in this study were indicated (A). Aliquots of in vitro synthesized LUC7L3 or ATF2 were mixed with a probe shown in (A), leading to the gel shift assay. Consensus binding sequences of CRE were used as probes for positive controls (B). In vitro translation of LUC7L3 was confirmed by immunoblotting (C).

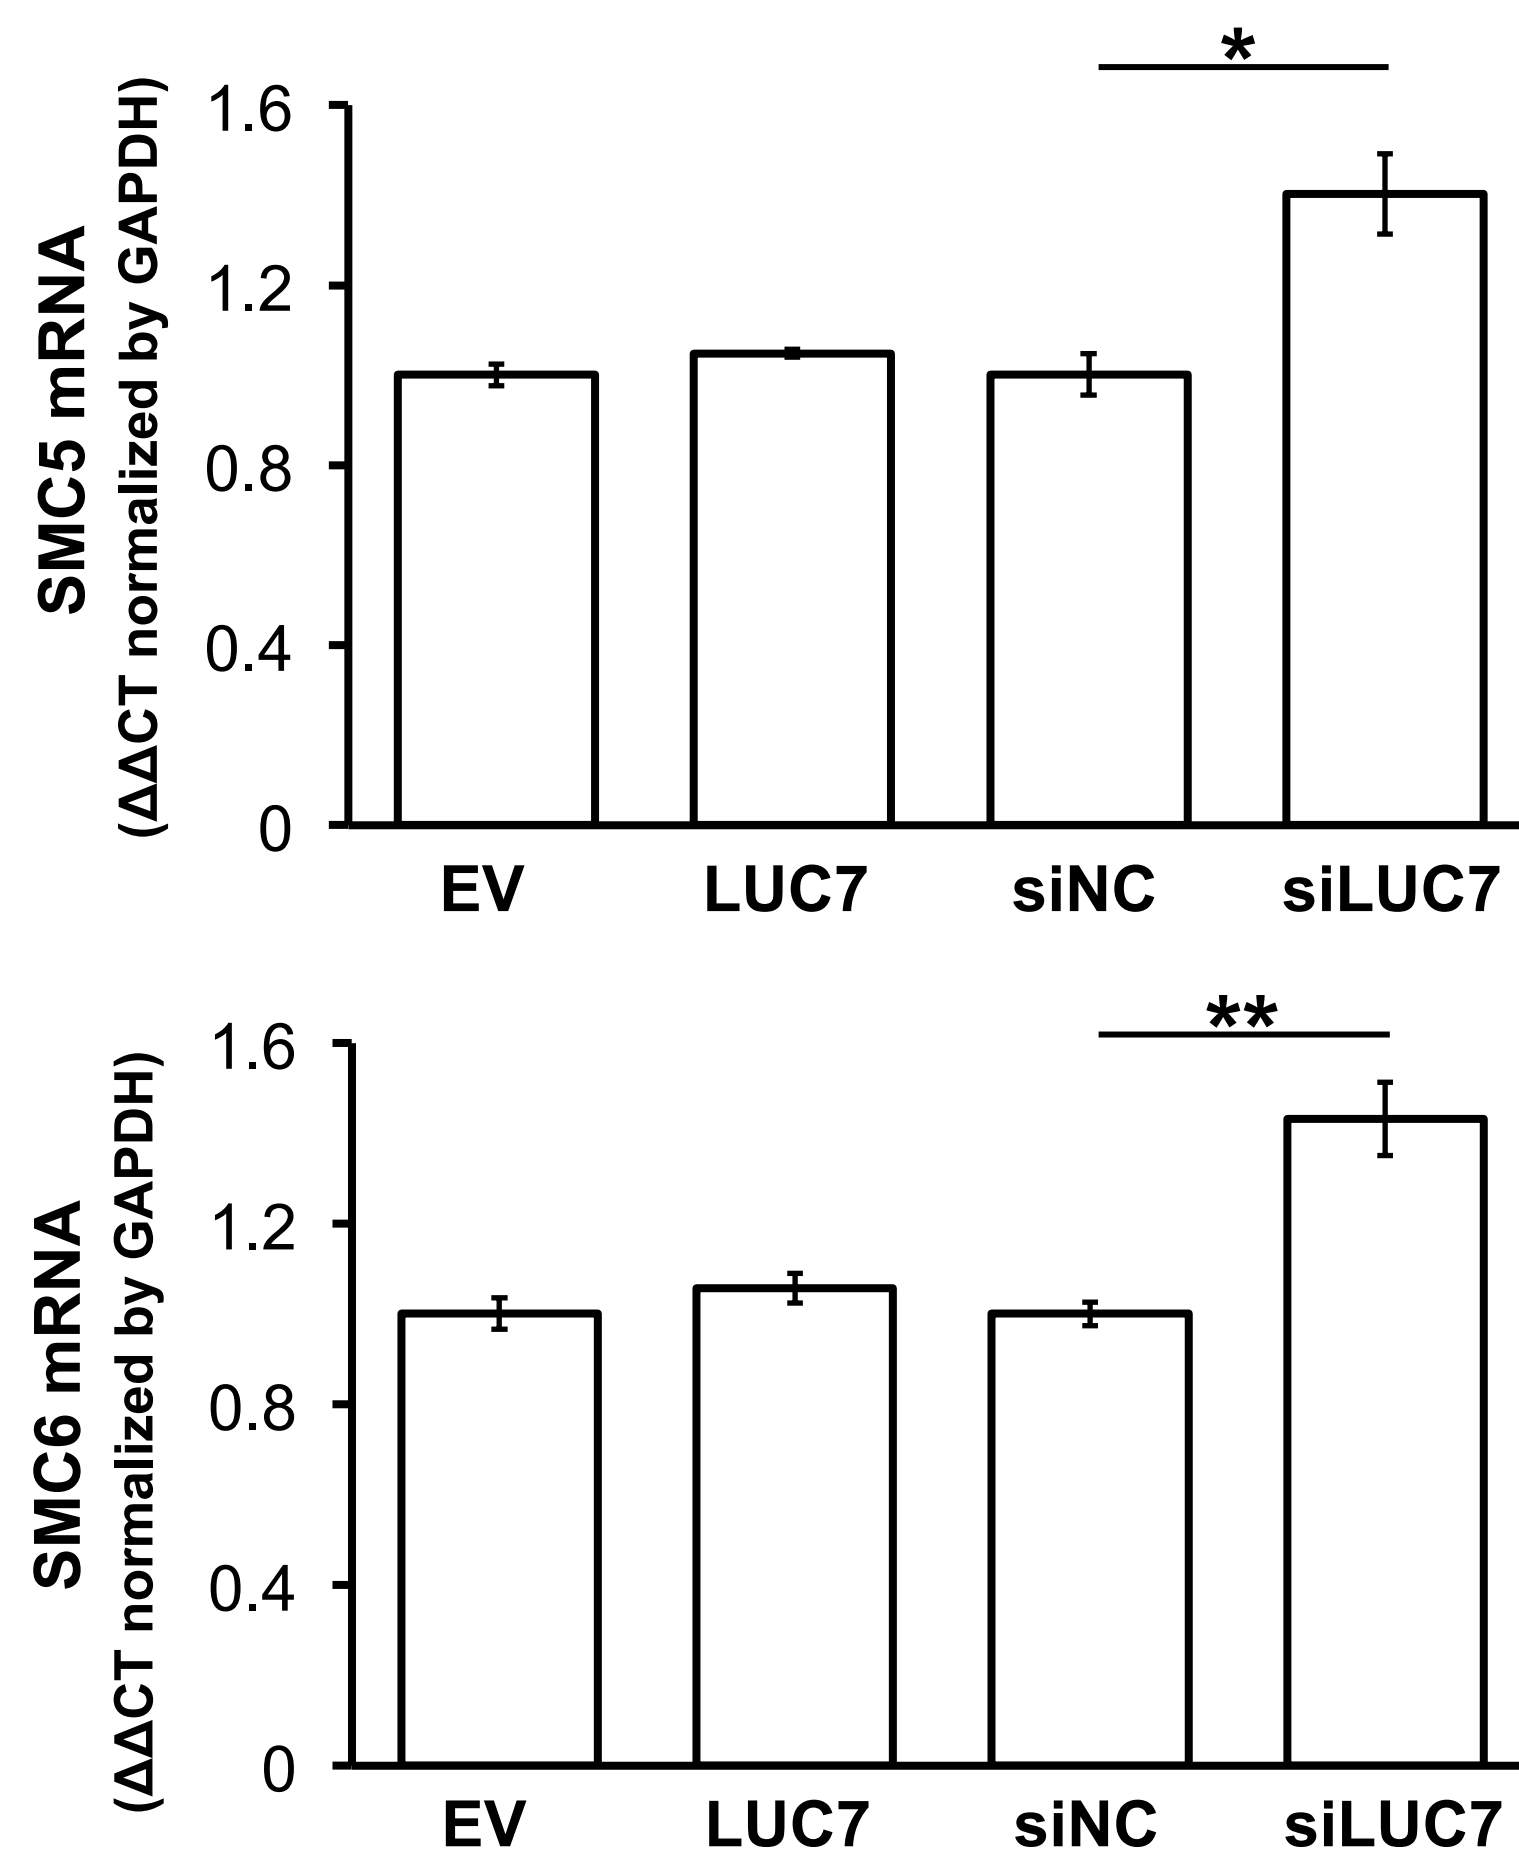

### Supplementary Figure S3

Effect of LUC7L3 on mRNA expression of SMC5 and SMC6. After overexpression or knockdown of LUC7L3, mRNA level of SMC5 (upper) and SMC6 (lower) was determined by qRT-PCR. For overexpression of LUC7L3, HuH7 cells were transfected with the LUC7L3-expression plasmid (LUC7) or an empty vector (EV), and harvested 2 days later. For knockdown of LUC7L3, HuH7 cells were transfected with siRNAs (siLUC7) or its negative control (siNC), and harvested 4 days later. Values shown represent the means with SEM obtained from three independent transfection of siRNAs or plasmids. Statistical significances compared with EV or siNC were shown. \* $p < 0.05$ , \*\* $p < 0.01$ , Student's t test.

**Supplementary Table S1. Proteins pulled down by ENII/BCP (nt 1627-1817) DNA probe.**

| Accession*    | Gene name    | Score**       | Accession*    | Gene name      | Score**      |
|---------------|--------------|---------------|---------------|----------------|--------------|
| P16403        | HIST1H1C     | 1992.92       | O75531        | BANF1          | 77.54        |
| P10412        | HIST1H1E     | 1837.35       | P05114        | HMG1           | 75.35        |
| P16401        | HIST1H1B     | 1809.89       | P68104        | EEF1A1         | 74.32        |
| P16402        | HIST1H1D     | 1390.47       | Q15287        | RNPS1          | 73.89        |
| Q02539        | HIST1H2BC    | 875.52        | P38646        | HSPA9          | 71.78        |
| P19338        | NCL          | 632.71        | Q13151        | HNRNPA0        | 69.72        |
| P35579        | MYH9         | 592.47        | P18124        | RPL7           | 66.50        |
| P62805        | HIST1H4A     | 534.35        | P25705        | ATP5A1         | 60.05        |
| <b>Q9UKV3</b> | <b>ACIN1</b> | <b>513.33</b> | P49756        | RBM25          | 57.77        |
| P62807        | HIST1H2B1C   | 503.80        | Q8IYB3        | SRRM1          | 54.91        |
| Q99880        | HIST1H2BL    | 480.66        | P05204        | HMG2           | 53.87        |
| P60709        | ACTB         | 478.00        | P11387        | TOP1           | 52.45        |
| P62750        | RPL23A       | 472.65        | P52926        | HMGA2          | 50.38        |
| Q16778        | HIST2H2BE    | 464.26        | Q07666        | KHDRBS1        | 48.55        |
| P06899        | HIST1H2BJ    | 446.49        | P31943        | HNRNPH1        | 47.81        |
| P20671        | HIST1H2AD    | 428.68        | Q04837        | SSBP1          | 45.26        |
| Q8N257        | HIST3H2BB    | 423.85        | O00479        | HMG4           | 45.06        |
| Q93077        | HIST1H2AC    | 417.48        | P62841        | RPS15          | 43.56        |
| P04908        | HIST1H2AB    | 399.76        | Q9NR30        | DDX21          | 43.42        |
| Q00839        | HNRNPU       | 378.58        | Q8NFC6        | BOD1L1         | 42.65        |
| P07305        | H1FO         | 375.95        | Q15365        | PCBP1          | 40.90        |
| Q02878        | RPL6         | 356.03        | P08621        | SNRNP70        | 40.16        |
| P67809        | YBX1         | 282.77        | P04406        | GAPDH          | 40.01        |
| Q14978        | NOLC1        | 276.67        | O00571        | DDX3X          | 39.88        |
| P12956        | XRCC6        | 262.29        | <b>Q9NYF8</b> | <b>BCLAF1</b>  | <b>39.38</b> |
| Q92522        | H1FX         | 259.89        | Q9UKM9        | RALY           | 38.29        |
| Q5SSJ5        | HP1BP3       | 231.42        | <b>O95232</b> | <b>LUC7L3</b>  | <b>37.62</b> |
| P68431        | HIST1H3A     | 177.13        | P62847        | RPS24          | 36.04        |
| P35580        | MYH10        | 174.06        | P42677        | RPS27          | 35.57        |
| P68363        | TUBA1B       | 166.56        | Q05519        | SRSF11         | 34.70        |
| Q9BQE3        | TUBA1C       | 164.32        | Q14980        | NUMA1          | 34.28        |
| O75683        | SURF6        | 156.78        | <b>P17096</b> | <b>HMGA1</b>   | <b>33.58</b> |
| P07437        | TUBB         | 140.16        | Q9UHX1        | PUF60          | 33.43        |
| P07910        | HNRNPC       | 125.75        | <b>P62633</b> | <b>CNBP1</b>   | <b>33.35</b> |
| P0C0S5        | H2AFZ        | 121.36        | <b>Q7Z4V5</b> | <b>HDGFRP2</b> | <b>30.11</b> |
| P11021        | HSPA5        | 119.97        | O95831        | AIFM1          | 29.58        |
| P11142        | HSPA8        | 118.80        | O60841        | EIF5B          | 29.45        |
| Q9H307        | PNN          | 109.13        | P52272        | HNRNPM         | 26.03        |
| P13010        | XRCC5        | 97.94         | P10809        | HSPD1          | 25.45        |
| Q9HCC0        | MCCC2        | 88.72         | P23396        | RPS3           | 24.09        |
| P68371        | TUBB4B       | 83.90         | Q92466        | DDB2           | 23.63        |
| P42696        | RBM34        | 83.15         | Q92841        | DDX17          | 22.82        |
| O94776        | MTA2         | 82.36         | Q8WUU4        | ZNF296         | 22.45        |
| P45880        | VDAC2        | 78.79         | <b>P49711</b> | <b>CTCF</b>    | <b>20.18</b> |
| P38159        | RBMX         | 78.02         |               |                |              |

Note: Genes analyzed in this study are highlighted in bold. \*Swiss-Prot/UniProtKB accession number. \*\* Sum of the scores of the individual peptides calculated by SEQUEST algorithm for the match.
